# Supplementary material for: Is Craniosacral Therapy Effective? A Systematic Review and Meta-Analysis
Source: MDPI journal article supplement (doi:10.3390/healthcare12060679), 2024-03-18
Supplement: s1 [file s1]

## Supplementary material: Forest plot of the outcome variables

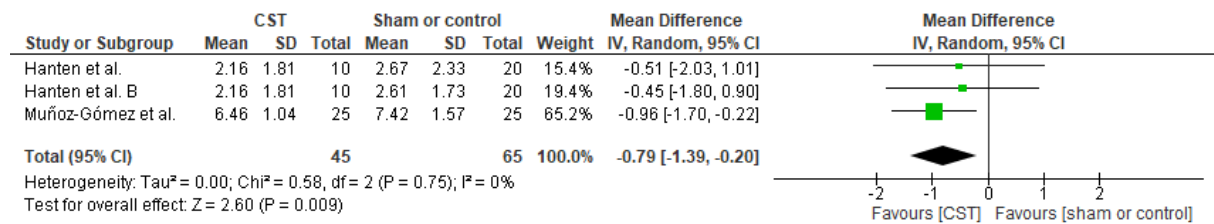

Figure S1. Forest plot of pain intensity in headache disorders [34,38].

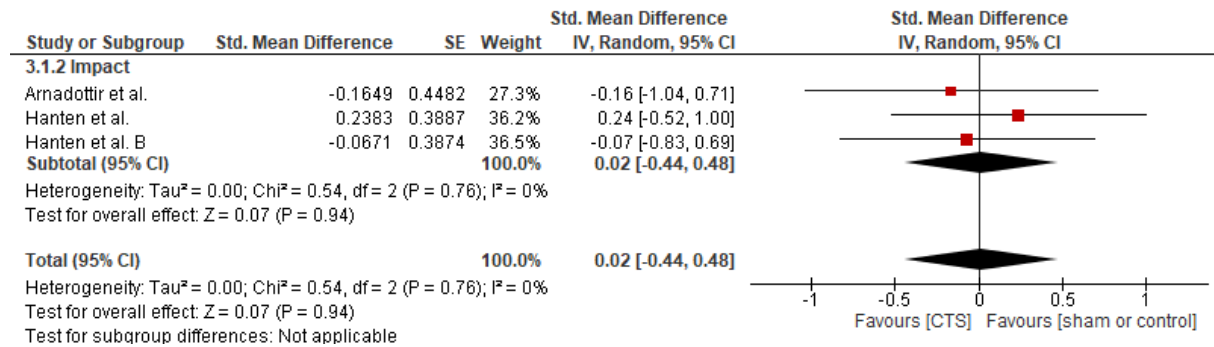

Figure S2. Forest plot of impact in headache disorders [34,37].

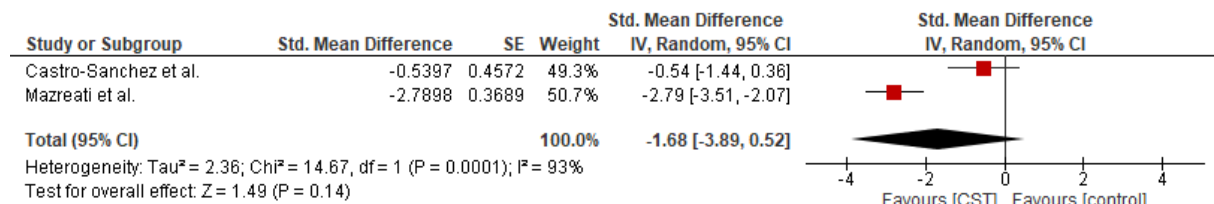

Figure S3. Forest plot of pain intensity in low back pain [33,39].

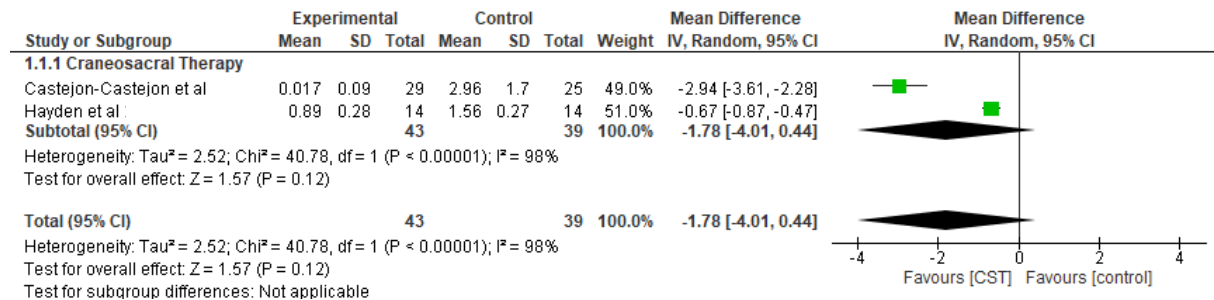

Figure S4. Forest plot of crying time in infantile colic [40,41].

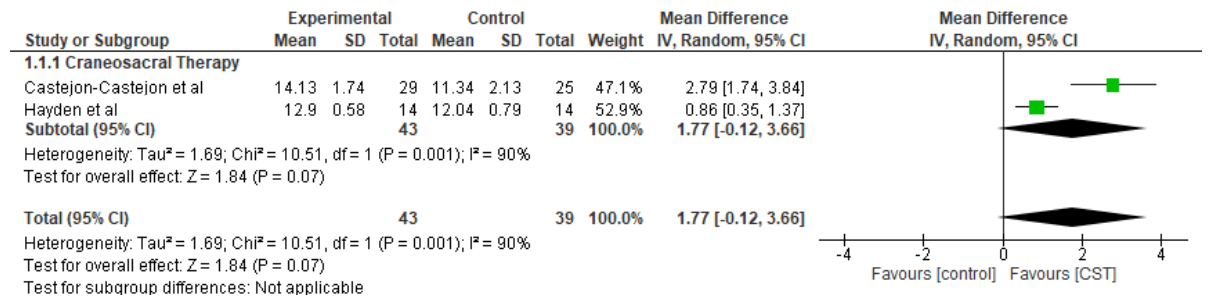

Figure S5. Forest plot of sleeping time in infantile colic [40,41].
